# Supplementary material
Source: MDPI journal article supplement (https://www.mdpi.com/1424-2818/14/10/868)
Supplement: s1 [file s1 › diversity-1928855-supplementary.pdf]

## Supplementary Materials

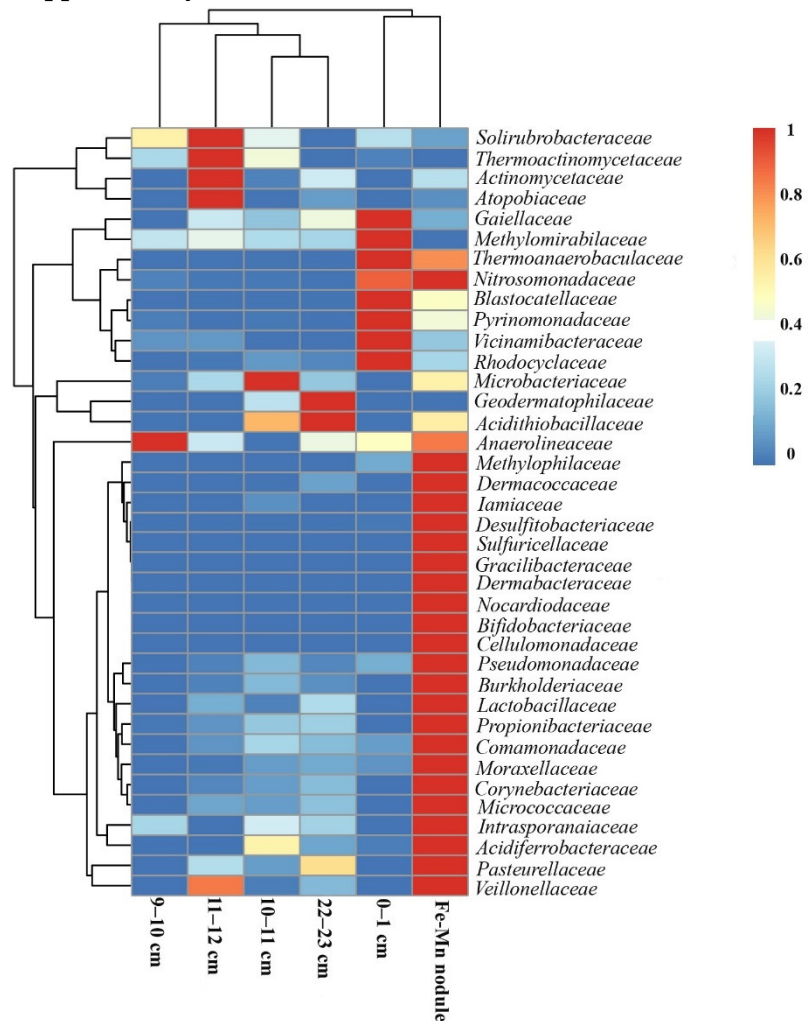

**Figure S1.** Heat map showing differences in the relative abundance of phyla (classes) in the samples, leading to the formation of two clusters (average linkage clustering) based on the Bray-Curtis distances. The colors mark the normalized relative abundance of taxa across all stations.

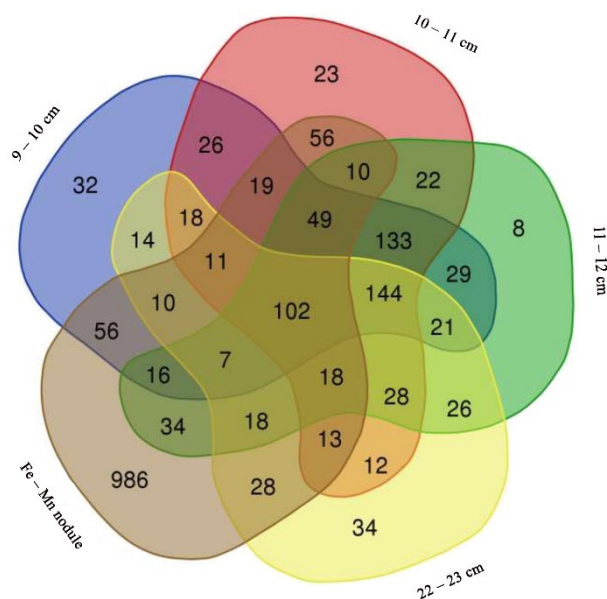

**Figure S2.** Venn diagram revealed both general and unique OTUs for each community analyzed.

**Table S1.** Number of reads, OTUs and indices of species hidden richness and evenness in the non-rarefied libraries of bacterial and archaeal 16S rRNA gene fragments (for a cluster distance of 0.03).

| <b>Sediment layer, Cmb/f</b> | <b>Reads Bacteria/Arc<br/>haea</b> | <b>OTU<sub>0.03</sub> Bacteria/Arc<br/>haea</b> | <b>ACE Bacteria/Arc<br/>haea</b> | <b>Chao1 Bacteria/Arc<br/>haea</b> | <b>Shannon Bacteria/Arc<br/>haea</b> | <b>Inverse Simpson Bacteria/Arc<br/>haea</b> |
|------------------------------|------------------------------------|-------------------------------------------------|----------------------------------|------------------------------------|--------------------------------------|----------------------------------------------|
| 0–1                          | 5785/15144                         | 732/175                                         | 889/187.1                        | 941/188.8                          | 5.6/2.2                              | 95.7/4.2                                     |
| 9–10                         | 23884/13808                        | 687/109                                         | 764/125.7                        | 771/124.4                          | 4.8/2.5                              | 47.9/8.4                                     |
| 10–11                        | 16922/5979                         | 684/76                                          | 767/89.3                         | 761/127                            | 4.9/2.1                              | 61.1/5.0                                     |
| 11–12                        | 16684/8303                         | 665/83                                          | 749/102                          | 762/95.2                           | 4.9/2.4                              | 49.7/6.6                                     |
| 22–23                        | 24569/13383                        | 504/60                                          | 606/65.8                         | 607/67.2                           | 4.1/1.9                              | 22.9/4.0                                     |
| Fe-Mn<br>Nodules             | 64670/-*                           | 1433/-                                          | 1439/-                           | 1450/-                             | 4.9/-                                | 15.2/-                                       |

\* Results are absent.
